# Supplementary material for: Kombucha Beverages Produced from Fruits, Vegetables, and Plants: A Review on Their Pharmacological Activities and Health Benefits
Source: MDPI journal article supplement (doi:10.3390/foods12091818), 2023-04-27
Supplement: s1 [file s1]

**Supplementary Table S1: Antioxidant activities of kombucha tea**

| Name of fruits and vegetables              | Active ingredients                                                                                                                                                                                                                                                                                                         | Biological assays                                                                                                                       | Findings                                                                                                                                                                                                                                                                                                                                                                                                                                 | Ref. |
|--------------------------------------------|----------------------------------------------------------------------------------------------------------------------------------------------------------------------------------------------------------------------------------------------------------------------------------------------------------------------------|-----------------------------------------------------------------------------------------------------------------------------------------|------------------------------------------------------------------------------------------------------------------------------------------------------------------------------------------------------------------------------------------------------------------------------------------------------------------------------------------------------------------------------------------------------------------------------------------|------|
| <b>In vitro studies</b>                    |                                                                                                                                                                                                                                                                                                                            |                                                                                                                                         |                                                                                                                                                                                                                                                                                                                                                                                                                                          |      |
| ■ Black tea                                | ■ Polyphenols: theaflavin, thearubigin, caffeine                                                                                                                                                                                                                                                                           | ■ DPPH, ABTS, and hydroxyl radicals scavenging assay<br>■ NO scavenging assay<br>■ FRAP assay                                           | ■ The free radical scavenging ability of kombucha tea had highest effect on the 7 <sup>th</sup> day of fermentation and showed the decrease in IC <sub>50</sub> values by 38.4% to 45.8% on the 21 <sup>st</sup> day.<br>■ The reducing power of kombucha tea significantly increased by 35% and 44% in the 14 <sup>th</sup> and 21 <sup>st</sup> day of fermentation, respectively.                                                     | [18] |
| ■ Black Ceylon, green, white, and red teas | ■ Phenolic compounds<br>■ Flavonoids                                                                                                                                                                                                                                                                                       | ■ DPPH radical scavenging assay<br>■ FRAP assay                                                                                         | ■ Green tea kombucha showed the highest antioxidant property when compared with kombuchas made from other teas.<br>■ The highest DPPH scavenging activity of all kombuchas was observed at the 1 <sup>st</sup> day of fermentation, then it became lower with the time of fermentation.<br>■ FRAP of the kombuchas increased after fermentation for 7 days. However, it decreased when observed at 14 <sup>th</sup> day of fermentation. | [43] |
| ■ Black tea                                | ■ Polyphenols: theaflavin, thearubigin<br>■ Organic acids: acetic acid, gluconic acid, D-saccharic acid 1,4-lactone                                                                                                                                                                                                        | ■ DPPH, hydroxyl, and superoxide radicals scavenging assay                                                                              | ■ The free radical scavenging activities of kombucha on DPPH, hydroxyl and superoxide radicals increased by 18.9%, 17.2% and 14.97%, respectively.                                                                                                                                                                                                                                                                                       | [46] |
| ■ Black tea                                | ■ Phenolic compounds: gallic acid, catechin, (-)-epicatechin, caffeine, P-coumaric acid, ferulic acid, rutin hydrate, taxifolin, trans-cinnamic acid, 3-tert-butyl-4-hydroxybenzoic acid                                                                                                                                   | ■ DPPH scavenging assay                                                                                                                 | ■ DPPH scavenging activity was associated with the phenolic content in the samples.<br>■ The ethyl acetate fractions showed highest inhibitory effect against DPPH with IC <sub>50</sub> value of 9 µg/mL.<br>■ Whereas, the aqueous fractions had low activity with IC <sub>50</sub> value of >50 µg/mL.                                                                                                                                | [47] |
| ■ Black tea                                | ■ Phenolic compounds                                                                                                                                                                                                                                                                                                       | ■ Copper (Cu <sup>2+</sup> )-induced lipid peroxidation inhibitory effect<br>■ DPPH, hydroxyl, and superoxide radicals scavenging assay | ■ DPPH, hydroxyl, and superoxide radicals scavenging activities of traditional and modified kombuchas (fermented with <i>Gluconacetobacter</i> sp.) teas were found to increase during the fermentation process.<br>■ The kombucha samples could inhibit lipid peroxidation by prolonging the lag phase.                                                                                                                                 | [48] |
| ■ Black and green teas                     | ■ Phenolic compounds: theaflavin, thearubigin, Catechin, callocatechin 3- <i>O</i> -gallate, epigallocatechin 3- <i>O</i> -gallate, catechin 3- <i>O</i> -gallate, catechin 5- <i>O</i> -gallate, quercetin glycosides 5- <i>O</i> -galloyquinic acid, 4-coumaroylquinic acid derivatives, caffeoylquinic acid derivatives | ■ ABTS radicals scavenging assay                                                                                                        | ■ Black tea kombucha (13.59 µmol TE/mL) showed higher antioxidant capacity than green tea kombucha (8.22 µmol TE/mL).                                                                                                                                                                                                                                                                                                                    | [49] |
| ■ Black and green teas                     | ■ Phenolic compounds                                                                                                                                                                                                                                                                                                       | ■ DPPH, hydroxyl, and superoxide radicals scavenging assay<br>■ FRAP assay                                                              | ■ Green tea kombucha showed higher scavenging abilities against DPPH, hydroxyl, and superoxide radicals than black tea kombucha.<br>■ Black tea kombucha had higher FRAP than green tea kombucha.                                                                                                                                                                                                                                        | [50] |
| ■ Green tea                                | ■ Phenolic compounds                                                                                                                                                                                                                                                                                                       | ■ DPPH and superoxide radicals scavenging assay                                                                                         | ■ Green tea kombucha had higher scavenging activity against DPPH radicals and superoxide anion than unfermented green tea.                                                                                                                                                                                                                                                                                                               | [51] |
| ■ Black, green, and oolong teas            | ■ Phenolic compounds<br>■ Organic acids: acetic acid, gluconic acid, D-saccharic acid 1,4-lactone, glucuronic acid, ascorbic acid                                                                                                                                                                                          | ■ DPPH scavenging assay                                                                                                                 | ■ DPPH scavenging activity of green, oolong, and black tea kombuchas was significantly elevated after 3 days of fermentation and the ability was increased up to 2.642, 2.582, and 0.435 mg GAE/mL at 15 <sup>th</sup> , 9 <sup>th</sup> and 3 <sup>rd</sup> day of fermentation, respectively.                                                                                                                                          | [52] |

|                                                                                               |                                                                                                                                                                            |                                                         |                                                                                                                                                                                                                                                                  |             |
|-----------------------------------------------------------------------------------------------|----------------------------------------------------------------------------------------------------------------------------------------------------------------------------|---------------------------------------------------------|------------------------------------------------------------------------------------------------------------------------------------------------------------------------------------------------------------------------------------------------------------------|-------------|
| <p>■ Chinese black (CBT), oolong (COT), green teas (CGT), and Sri Lankan black tea (SLBT)</p> | <p>■ Phenolic compounds: epicatechin isomers: (-)-epicatechin (EC), (-)-epicatechin-3-gallate (ECG), (-)-epigallocatechin (EGC), (-)-epigallocatechin-3-gallate (EGCG)</p> | <p>■ DPPH radical scavenging assay<br/>■ ORAC assay</p> | <p>■ SLBT kombucha showed the highest DPPH radical scavenging and ORAC activities.<br/>■ ORAC of SLBT and CGT kombuchas showed significant increase in 1<sup>st</sup> day of fermentation and then slightly change until 7<sup>th</sup> day of fermentation.</p> | <p>[53]</p> |
|-----------------------------------------------------------------------------------------------|----------------------------------------------------------------------------------------------------------------------------------------------------------------------------|---------------------------------------------------------|------------------------------------------------------------------------------------------------------------------------------------------------------------------------------------------------------------------------------------------------------------------|-------------|
